# Supplementary material for: A one-pot approach using recyclable template to prepare dual-responsive yolk–shell or Janus-like nanoparticles
Source: Royal Society of Chemistry journal article supplement (doi:10.1039/c6py01816e), 2016-01-01
Supplement: c6py01816e1.pdf [file c6py01816e1.pdf]

## Electronic Supplementary Information

### A one-pot approach using recyclable template to dual-responsive yolk-shell or Janus-like nanoparticles

Shuai Long<sup>1</sup>, Chunyang Chen<sup>1</sup>, Jun Luo<sup>1</sup>, Haiyan Dong<sup>1,\*</sup>, Limin Wu<sup>2</sup>, and Daoyong Chen<sup>1,\*</sup>

<sup>1</sup> The State Key Laboratory of Molecular Engineering of Polymers  
Department of Macromolecular Science

<sup>2</sup> Department of Materials Science  
220 Handan Rd, Fudan University  
Shanghai, 200433, China.

Email: [chendy@fudan.edu.cn](mailto:chendy@fudan.edu.cn)

Tel: +86-21-6564 3989

Fax: +86-21-6564 0293

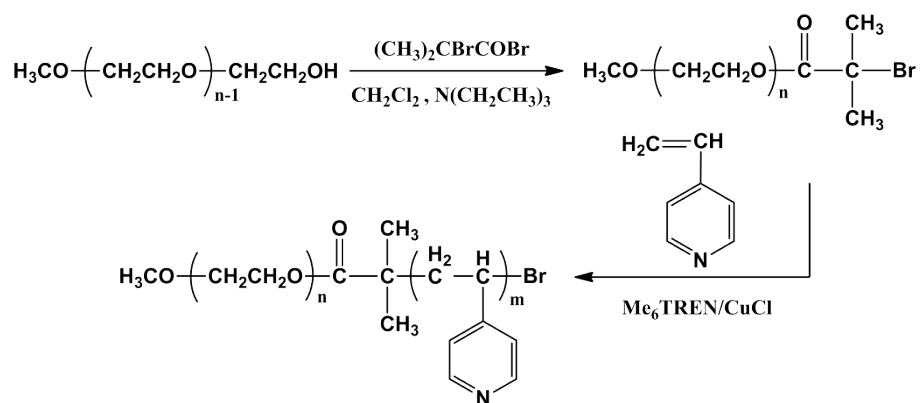

Figure S1 The synthesis route for diblock copolymer PEO-*b*-P4VP

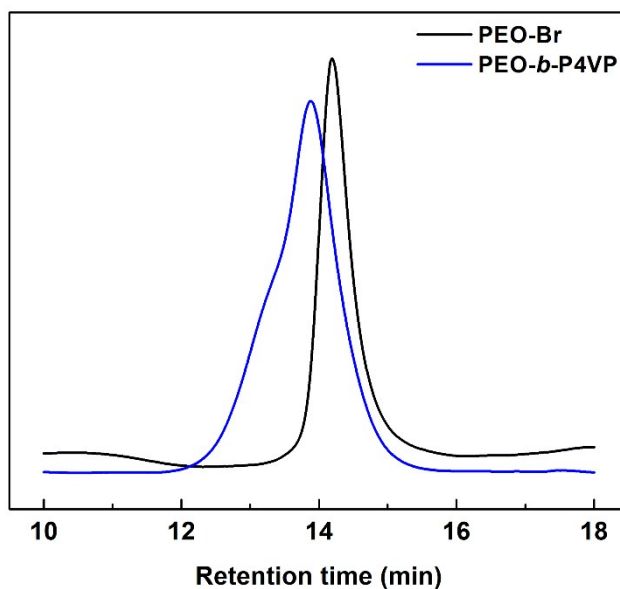

Figure S2 GPC curves of macro-initiator PEO-Br and diblock copolymer PEO-*b*-P4VP

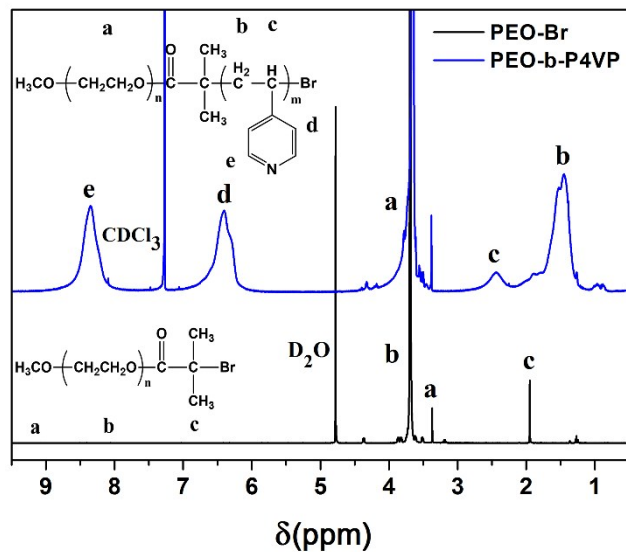

Figure S3  $^1\text{H}$  NMR spectra of macro-initiator PEO-Br and diblock copolymer PEO-b-P4VP

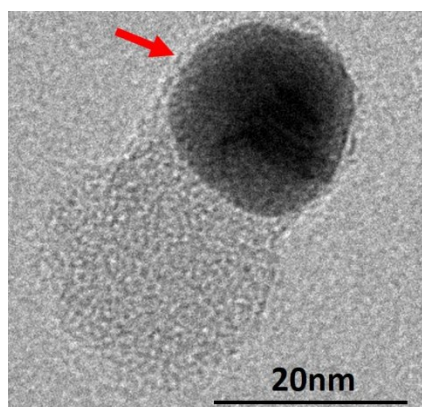

Figure S4 Molecular formula of PP probe

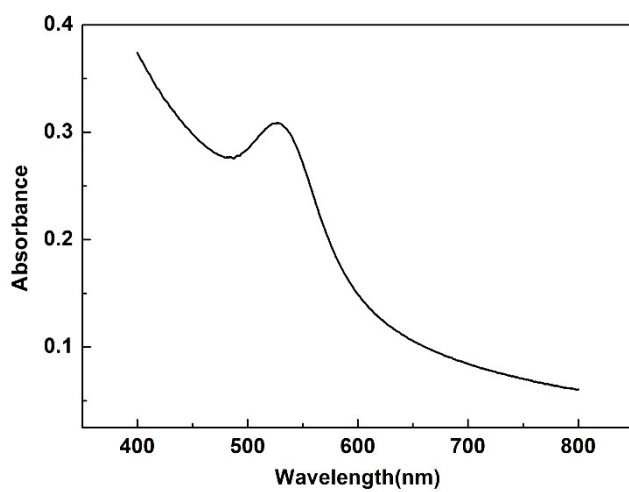

Figure S5 UV-vis spectrum of YSNs in water
